# Supplementary material for: Formal SiH4 chemistry using stable and easy-to-handle surrogates
Source: Springer Nature journal article supplement (doi:10.1038/nchem.2329), 2015-08-24
Supplement: 41557_2015_BFnchem2329_MOESM1_ESM.mol [file 41557_2015_BFnchem2329_MOESM1_ESM.mol]

  ChemDraw08051510262D

 34 36  0  0  0  0  0  0  0  0999 V2000
    3.0722    0.5981    0.0000 F   0  0  0  0  0  0  0  0  0  0  0  0
    2.3578    1.0106    0.0000 C   0  0  0  0  0  0  0  0  0  0  0  0
    1.6433    0.5981    0.0000 C   0  0  0  0  0  0  0  0  0  0  0  0
    1.6433   -0.2269    0.0000 F   0  0  0  0  0  0  0  0  0  0  0  0
    0.9288    1.0106    0.0000 C   0  0  0  0  0  0  0  0  0  0  0  0
    0.0000    0.4744    0.0000 B   0  0  0  0  0  0  0  0  0  0  0  0
   -0.9288    1.0106    0.0000 C   0  0  0  0  0  0  0  0  0  0  0  0
   -1.6433    0.5981    0.0000 C   0  0  0  0  0  0  0  0  0  0  0  0
   -1.6433   -0.2269    0.0000 F   0  0  0  0  0  0  0  0  0  0  0  0
   -2.3578    1.0106    0.0000 C   0  0  0  0  0  0  0  0  0  0  0  0
   -3.0722    0.5981    0.0000 F   0  0  0  0  0  0  0  0  0  0  0  0
   -2.3578    1.8356    0.0000 C   0  0  0  0  0  0  0  0  0  0  0  0
   -3.0722    2.2481    0.0000 F   0  0  0  0  0  0  0  0  0  0  0  0
   -1.6433    2.2481    0.0000 C   0  0  0  0  0  0  0  0  0  0  0  0
   -1.6433    3.0731    0.0000 F   0  0  0  0  0  0  0  0  0  0  0  0
   -0.9288    1.8356    0.0000 C   0  0  0  0  0  0  0  0  0  0  0  0
   -0.2143    2.2481    0.0000 F   0  0  0  0  0  0  0  0  0  0  0  0
    0.0000   -0.5981    0.0000 C   0  0  0  0  0  0  0  0  0  0  0  0
    0.7145   -1.0106    0.0000 C   0  0  0  0  0  0  0  0  0  0  0  0
    1.4289   -0.5981    0.0000 F   0  0  0  0  0  0  0  0  0  0  0  0
    0.7145   -1.8356    0.0000 C   0  0  0  0  0  0  0  0  0  0  0  0
    1.4289   -2.2481    0.0000 F   0  0  0  0  0  0  0  0  0  0  0  0
    0.0000   -2.2481    0.0000 C   0  0  0  0  0  0  0  0  0  0  0  0
    0.0000   -3.0731    0.0000 F   0  0  0  0  0  0  0  0  0  0  0  0
   -0.7145   -1.8356    0.0000 C   0  0  0  0  0  0  0  0  0  0  0  0
   -1.4289   -2.2481    0.0000 F   0  0  0  0  0  0  0  0  0  0  0  0
   -0.7145   -1.0106    0.0000 C   0  0  0  0  0  0  0  0  0  0  0  0
   -1.4289   -0.5981    0.0000 F   0  0  0  0  0  0  0  0  0  0  0  0
    0.9288    1.8356    0.0000 C   0  0  0  0  0  0  0  0  0  0  0  0
    0.2143    2.2481    0.0000 F   0  0  0  0  0  0  0  0  0  0  0  0
    1.6433    2.2481    0.0000 C   0  0  0  0  0  0  0  0  0  0  0  0
    1.6433    3.0731    0.0000 F   0  0  0  0  0  0  0  0  0  0  0  0
    2.3578    1.8356    0.0000 C   0  0  0  0  0  0  0  0  0  0  0  0
    3.0722    2.2481    0.0000 F   0  0  0  0  0  0  0  0  0  0  0  0
  1  2  1  0      
  2  3  2  0      
  3  4  1  0      
  3  5  1  0      
  5  6  1  0      
  6  7  1  0      
  7  8  2  0      
  8  9  1  0      
  8 10  1  0      
 10 11  1  0      
 10 12  2  0      
 12 13  1  0      
 12 14  1  0      
 14 15  1  0      
 14 16  2  0      
  7 16  1  0      
 16 17  1  0      
  6 18  1  0      
 18 19  2  0      
 19 20  1  0      
 19 21  1  0      
 21 22  1  0      
 21 23  2  0      
 23 24  1  0      
 23 25  1  0      
 25 26  1  0      
 25 27  2  0      
 18 27  1  0      
 27 28  1  0      
  5 29  2  0      
 29 30  1  0      
 29 31  1  0      
 31 32  1  0      
 31 33  2  0      
  2 33  1  0      
 33 34  1  0      
M  END
