# Supplementary material for: Formal SiH4 chemistry using stable and easy-to-handle surrogates
Source: Springer Nature journal article supplement (doi:10.1038/nchem.2329), 2015-08-24

Tetra(cyclohexa-2,5-dien-1-yl)silane (**2a**) $^1\text{H}$  NMR ( $\text{C}_6\text{D}_6$ , 500 MHz)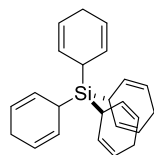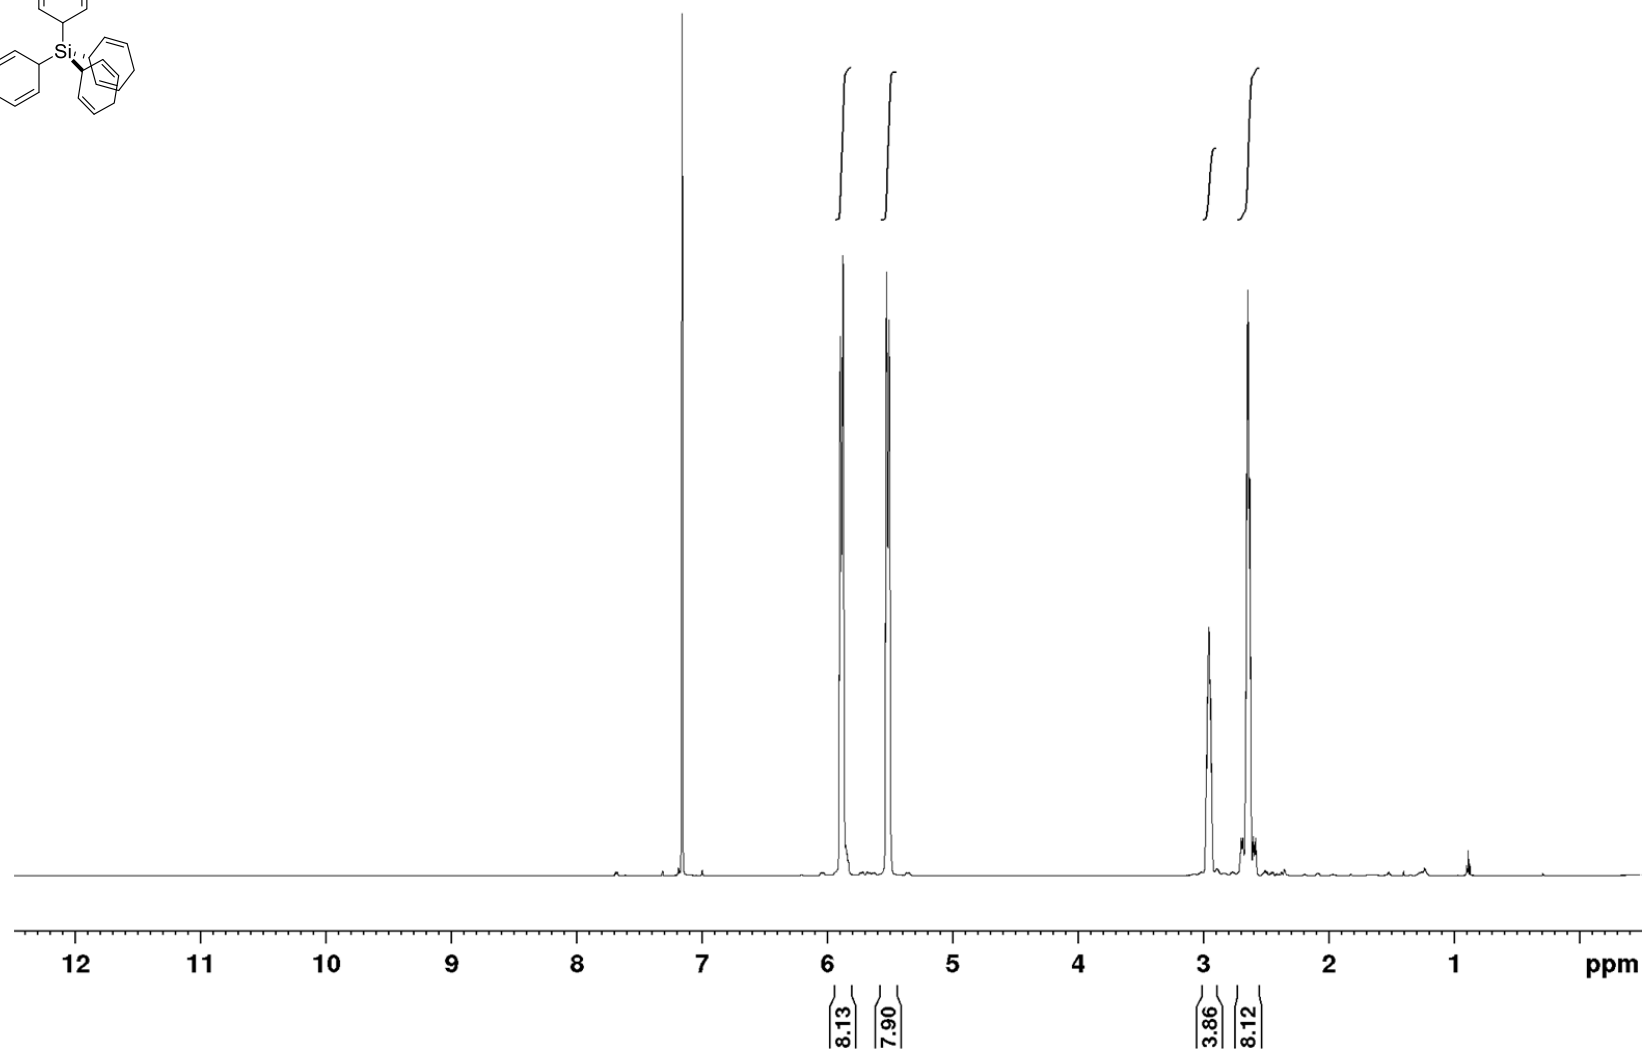

$^{13}\text{C}$  NMR ( $\text{C}_6\text{D}_6$ , 126 MHz)

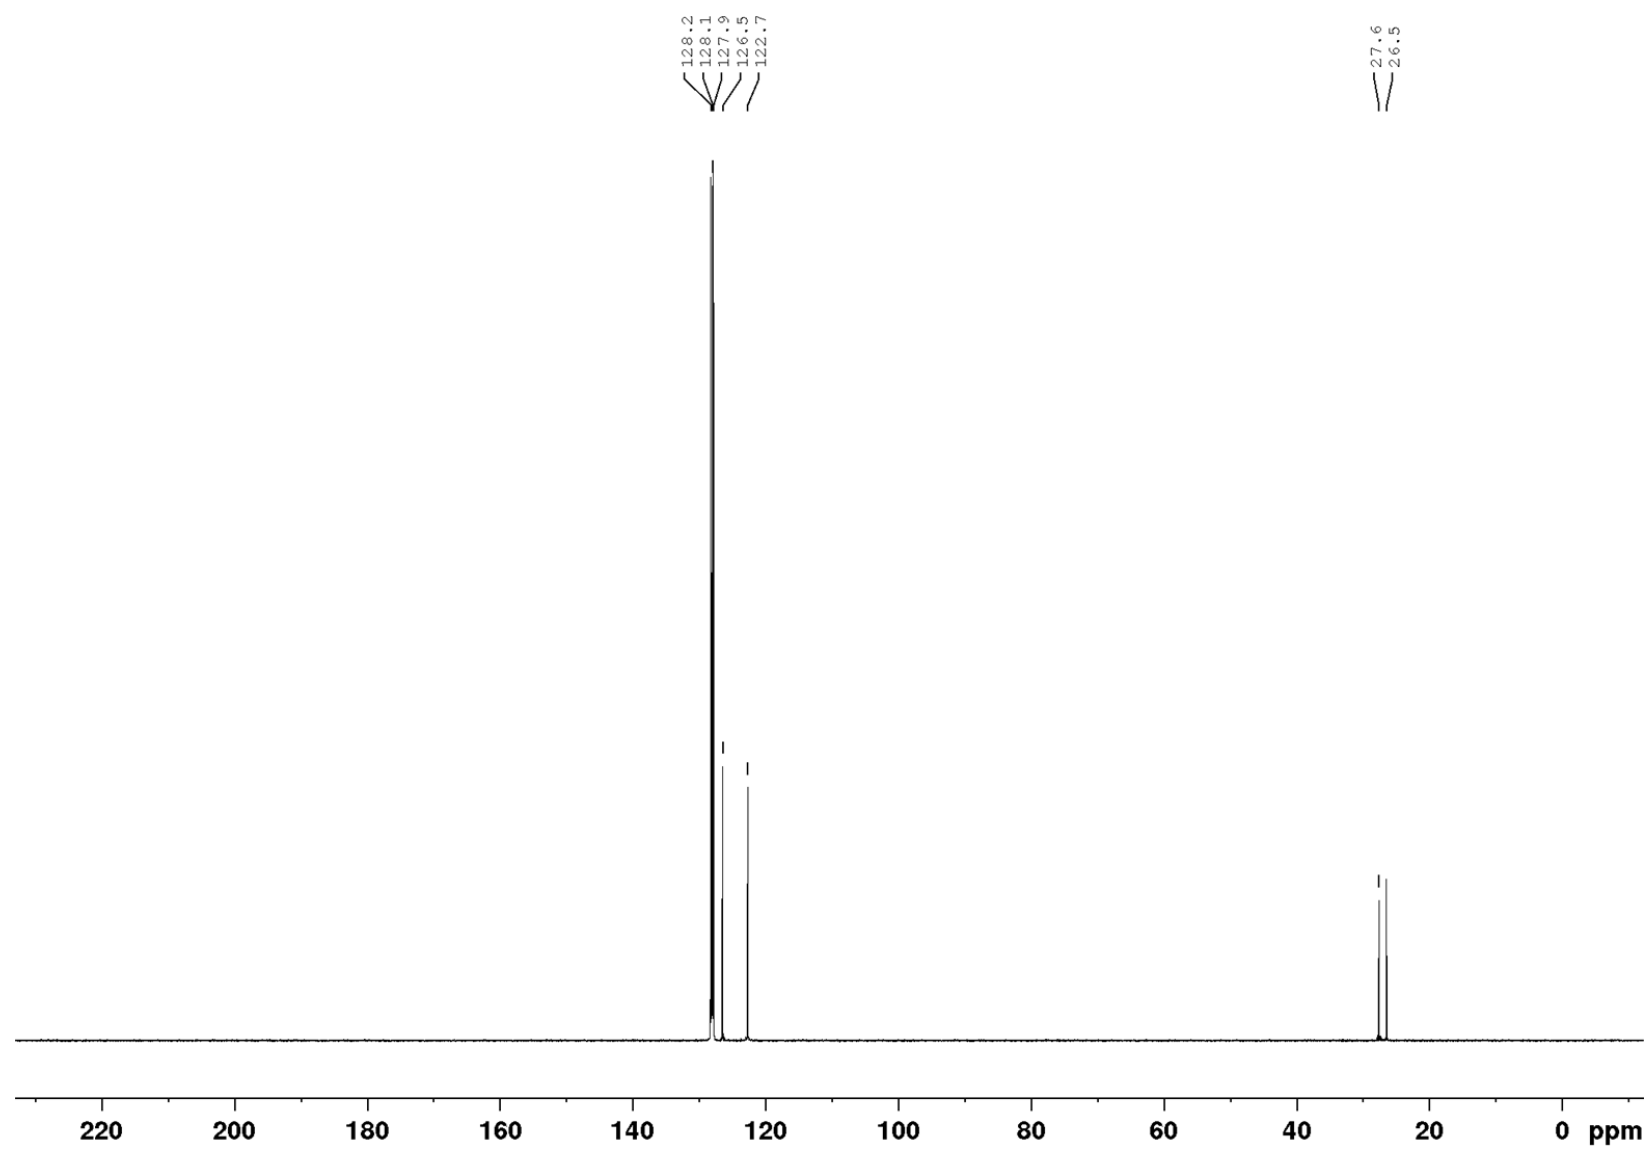

$^1\text{H}$ - $^{29}\text{Si}$  HMQC 2D NMR ( $\text{C}_6\text{D}_6$ , SFO1 500 MHz, SFO2 99 MHz)

ans412 12 1 \\afs\tu-berlin.de\units\Fak\_II\organometallics\volume\group\NMR\av500c85\data\ans\nmr

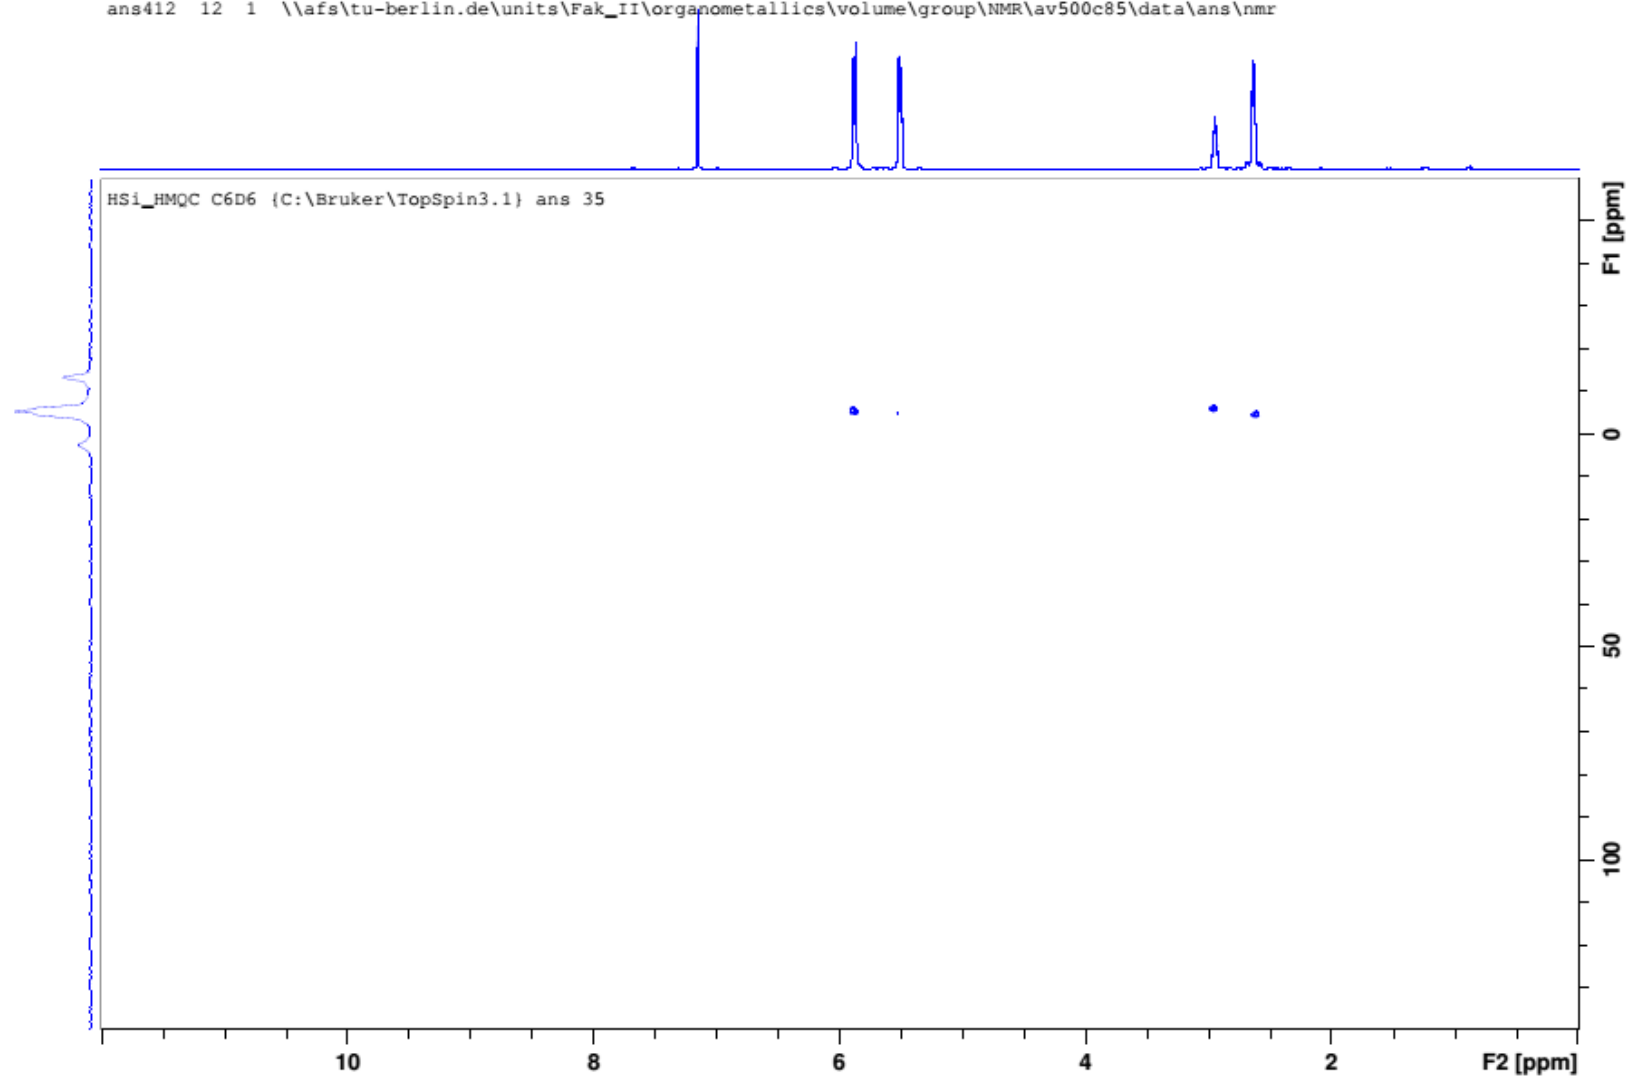

Supplement: 41557_2015_BFnchem2329_MOESM10_ESM.pdf [file 41557_2015_BFnchem2329_MOESM10_ESM.pdf]
