# Supplementary material for: Formal SiH4 chemistry using stable and easy-to-handle surrogates
Source: Springer Nature journal article supplement (doi:10.1038/nchem.2329), 2015-08-24

Tri(cyclohexa-2,5-dien-1-yl)silane (**2b**) $^1\text{H}$  NMR ( $\text{C}_6\text{D}_6$ , 500 MHz)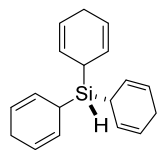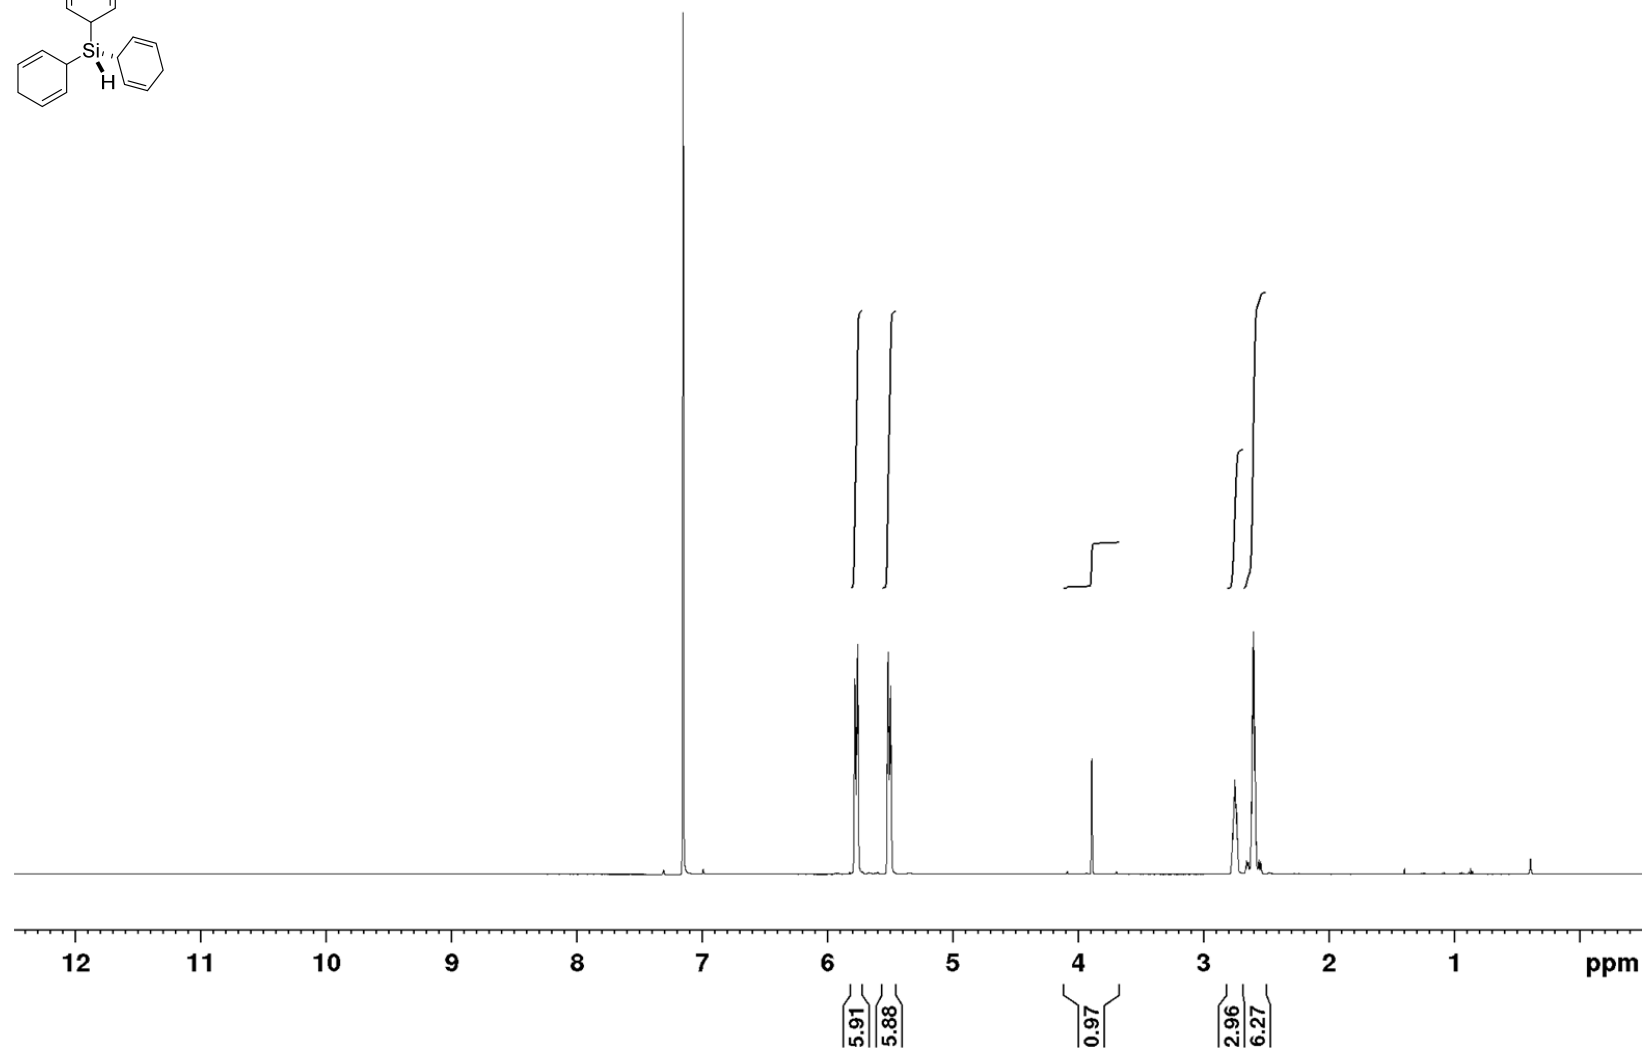

$^{13}\text{C}$  NMR ( $\text{C}_6\text{D}_6$ , 126 MHz)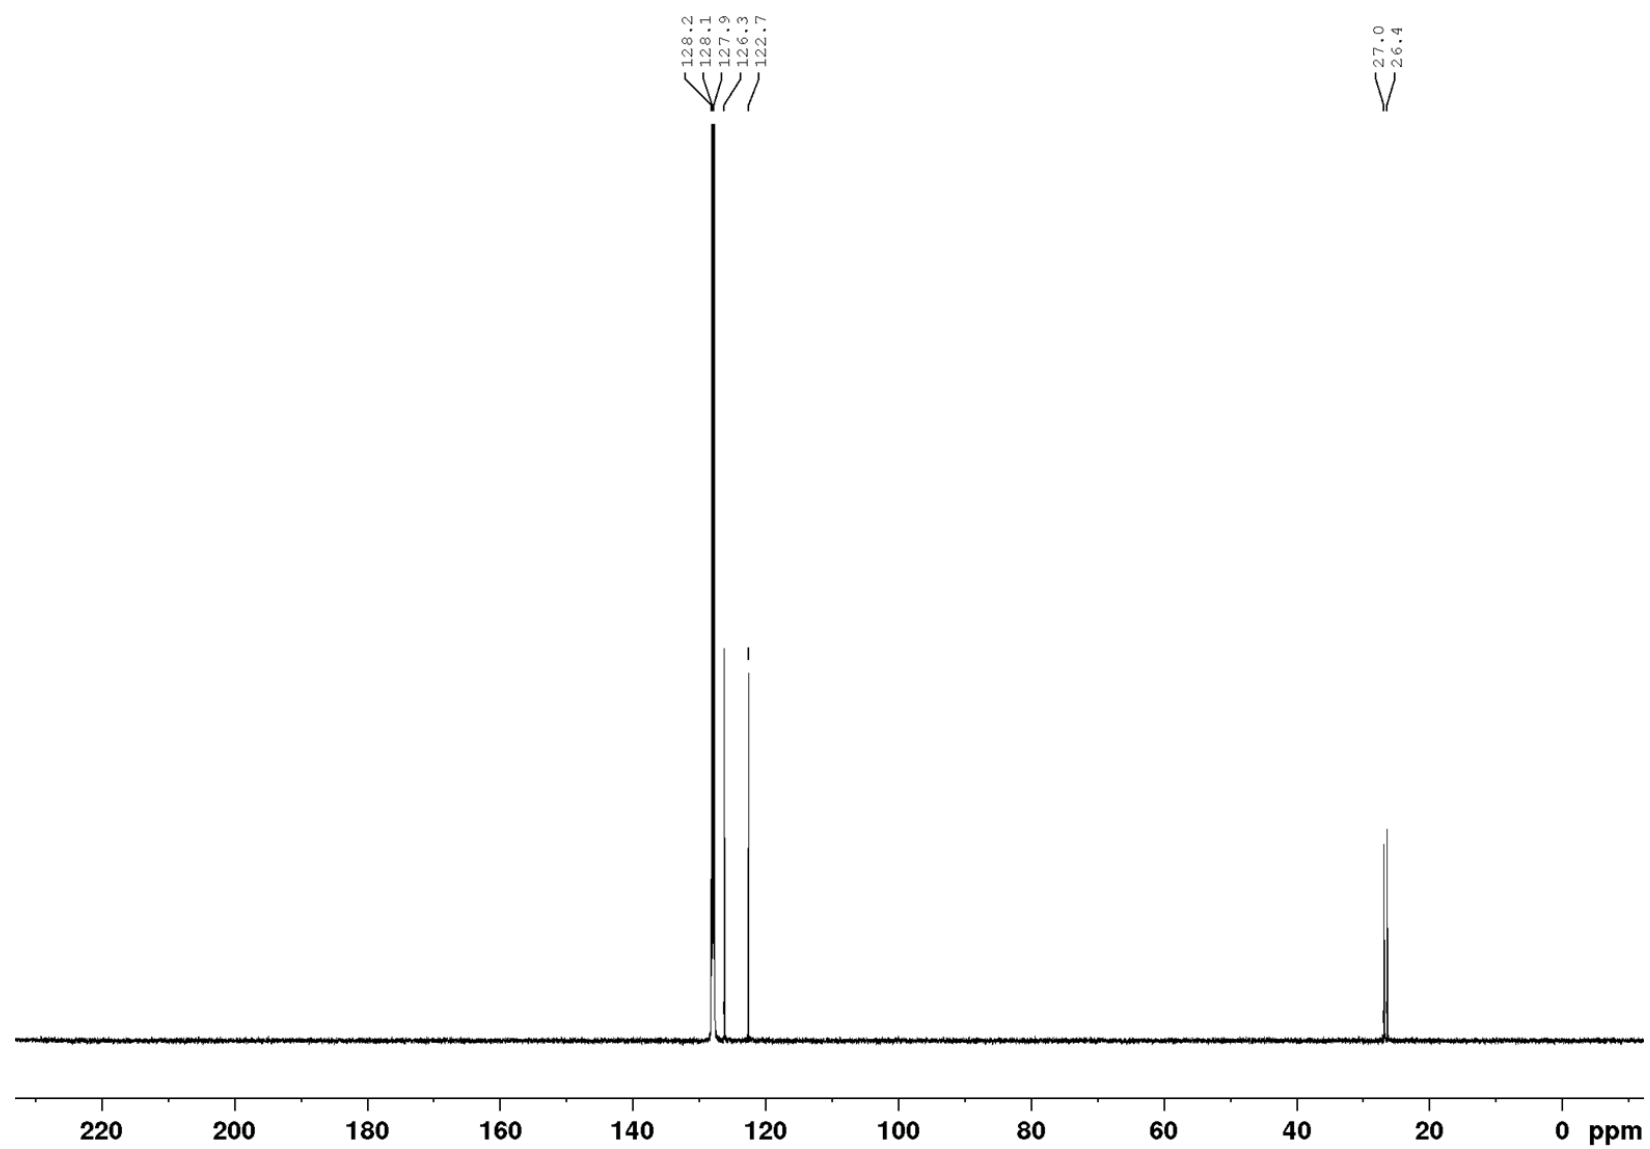

$^{29}\text{Si}$ -dept NMR ( $\text{C}_6\text{D}_6$ , 99 MHz)

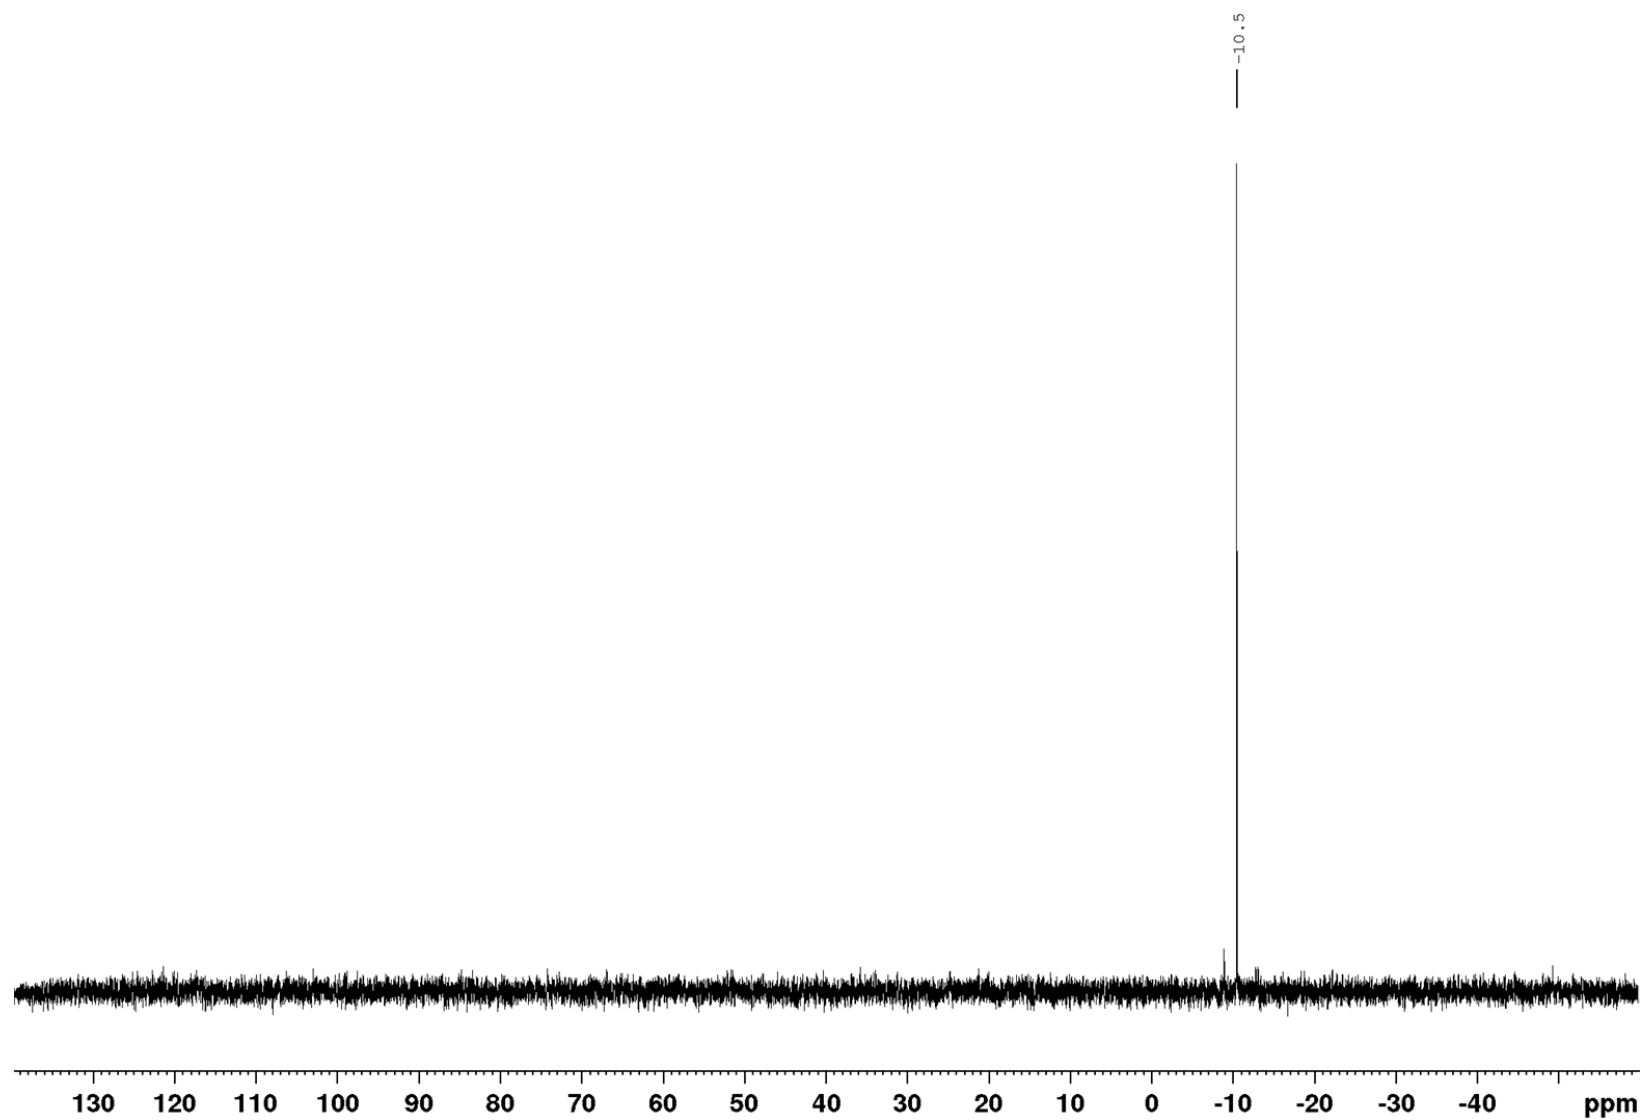

Supplement: 41557_2015_BFnchem2329_MOESM13_ESM.pdf [file 41557_2015_BFnchem2329_MOESM13_ESM.pdf]
