# Supplementary material for: Formal SiH4 chemistry using stable and easy-to-handle surrogates
Source: Springer Nature journal article supplement (doi:10.1038/nchem.2329), 2015-08-24
Supplement: 41557_2015_BFnchem2329_MOESM14_ESM.cif [file 41557_2015_BFnchem2329_MOESM14_ESM.cif]

 
data_cu-1085 
 
_audit_creation_method
;
CrysAlisPro, Agilent Technologies,
Version 1.171.37.35 (release 13-08-2014 CrysAlis171 .NET)
(compiled Aug 13 2014,18:06:01)
;
_chemical_name_systematic 
; 
 ? 
; 
_chemical_name_common             ? 
_chemical_melting_point           ? 
_chemical_formula_moiety          ? 
_chemical_formula_sum 
 'C18 H22 Si' 
_chemical_formula_weight          266.45 
 
loop_ 
 _atom_type_symbol 
 _atom_type_description 
 _atom_type_scat_dispersion_real 
 _atom_type_scat_dispersion_imag 
 _atom_type_scat_source 
 'C'  'C'   0.0181   0.0091 
 'International Tables Vol C Tables 4.2.6.8 and 6.1.1.4' 
 'H'  'H'   0.0000   0.0000 
 'International Tables Vol C Tables 4.2.6.8 and 6.1.1.4' 
 'Si'  'Si'   0.2541   0.3302 
 'International Tables Vol C Tables 4.2.6.8 and 6.1.1.4' 
 
_symmetry_cell_setting            triclinic 
_symmetry_space_group_name_H-M    P-1 
 
loop_ 
 _symmetry_equiv_pos_as_xyz 
 'x, y, z' 
 '-x, -y, -z' 
 
_cell_length_a                    6.5955(3) 
_cell_length_b                    9.2964(4) 
_cell_length_c                    12.8450(6) 
_cell_angle_alpha                 79.875(4) 
_cell_angle_beta                  89.868(4) 
_cell_angle_gamma                 75.119(4) 
_cell_volume                      748.56(6) 
_cell_formula_units_Z             2 
_cell_measurement_temperature     150(2) 
_cell_measurement_reflns_used     3364
_cell_measurement_theta_min       3.4920
_cell_measurement_theta_max       73.5140
 
_exptl_crystal_description        block 
_exptl_crystal_colour             colourless 
_exptl_crystal_size_max           0.57 
_exptl_crystal_size_mid           0.22 
_exptl_crystal_size_min           0.19 
_exptl_crystal_density_meas       ? 
_exptl_crystal_density_diffrn     1.182 
_exptl_crystal_density_method     'not measured' 
_exptl_crystal_F_000              288 
_exptl_absorpt_coefficient_mu     1.230 
_exptl_absorpt_correction_type    'multi-scan'
_exptl_absorpt_correction_T_min   0.5408 
_exptl_absorpt_correction_T_max   0.7999 
_exptl_absorpt_process_details
;
CrysAlisPro, Agilent Technologies,
Version 1.171.37.35 (release 13-08-2014 CrysAlis171 .NET)
(compiled Aug 13 2014,18:06:01)
Empirical absorption correction using spherical harmonics,
 implemented in SCALE3 ABSPACK scaling algorithm.
;
 
_exptl_special_details 
; 
 ? 
; 
 
_diffrn_ambient_temperature       150.00(10) 
_diffrn_ambient_environment       'N~2~'
_diffrn_source                    'sealed X-ray tube'
_diffrn_source_type               'SuperNova (Cu) X-ray Source'
_diffrn_radiation_probe           'x-ray'
_diffrn_radiation_type            'Cu K\a'
_diffrn_radiation_wavelength       1.54184
_diffrn_radiation_monochromator   'mirror'
_diffrn_measurement_device        'four-circle diffractometer'
_diffrn_measurement_device_type   'SuperNova, Single source at offset, Atlas'
_diffrn_detector                  'CCD plate'
_diffrn_detector_type             'Atlas'
_diffrn_measurement_method        '\w scans'
_diffrn_detector_area_resol_mean  10.5435
_diffrn_standards_number          ? 
_diffrn_standards_interval_count  ? 
_diffrn_standards_interval_time   ? 
_diffrn_standards_decay_%         ? 
_diffrn_reflns_number             4360 
_diffrn_reflns_av_R_equivalents   0.0212 
_diffrn_reflns_av_sigmaI/netI     0.0211 
_diffrn_reflns_limit_h_min        -6 
_diffrn_reflns_limit_h_max        7 
_diffrn_reflns_limit_k_min        -11 
_diffrn_reflns_limit_k_max        11 
_diffrn_reflns_limit_l_min        -15 
_diffrn_reflns_limit_l_max        15 
_diffrn_reflns_theta_min          3.50 
_diffrn_reflns_theta_max          67.48 
_reflns_number_total              2677 
_reflns_number_gt                 2552 
_reflns_threshold_expression      >2sigma(I) 
 
_computing_data_collection
;
CrysAlisPro, Agilent Technologies,
Version 1.171.37.35 (release 13-08-2014 CrysAlis171 .NET)
(compiled Aug 13 2014,18:06:01)
;
_computing_cell_refinement
;
CrysAlisPro, Agilent Technologies,
Version 1.171.37.35 (release 13-08-2014 CrysAlis171 .NET)
(compiled Aug 13 2014,18:06:01)
;
_computing_data_reduction
;
CrysAlisPro, Agilent Technologies,
Version 1.171.37.35 (release 13-08-2014 CrysAlis171 .NET)
(compiled Aug 13 2014,18:06:01)
;
_computing_structure_solution     'SHELXS-97 (Sheldrick, 1990)' 
_computing_structure_refinement   'SHELXL-97 (Sheldrick, 1997)' 
_computing_molecular_graphics     ? 
_computing_publication_material   ? 
 
_refine_special_details 
; 
 Refinement of F^2^ against ALL reflections.  The weighted R-factor wR and 
 goodness of fit S are based on F^2^, conventional R-factors R are based 
 on F, with F set to zero for negative F^2^. The threshold expression of 
 F^2^ > 2sigma(F^2^) is used only for calculating R-factors(gt) etc. and is 
 not relevant to the choice of reflections for refinement.  R-factors based 
 on F^2^ are statistically about twice as large as those based on F, and R- 
 factors based on ALL data will be even larger. 
; 
 
_refine_ls_structure_factor_coef  Fsqd  
_refine_ls_matrix_type            full 
_refine_ls_weighting_scheme       calc  
_refine_ls_weighting_details 
 'calc w=1/[\s^2^(Fo^2^)+(0.0544P)^2^+0.3334P] where P=(Fo^2^+2Fc^2^)/3' 
_atom_sites_solution_primary      direct 
_atom_sites_solution_secondary    difmap 
_atom_sites_solution_hydrogens    geom 
_refine_ls_hydrogen_treatment     mixed 
_refine_ls_extinction_method      SHELXL 
_refine_ls_extinction_coef        0.030(2) 
_refine_ls_extinction_expression 
 'Fc^*^=kFc[1+0.001xFc^2^\l^3^/sin(2\q)]^-1/4^' 
_refine_ls_number_reflns          2677 
_refine_ls_number_parameters      177 
_refine_ls_number_restraints      0 
_refine_ls_R_factor_all           0.0385 
_refine_ls_R_factor_gt            0.0367 
_refine_ls_wR_factor_ref          0.1000 
_refine_ls_wR_factor_gt           0.0990 
_refine_ls_goodness_of_fit_ref    1.058 
_refine_ls_restrained_S_all       1.058 
_refine_ls_shift/su_max           0.000 
_refine_ls_shift/su_mean          0.000 
 
loop_ 
 _atom_site_label 
 _atom_site_type_symbol 
 _atom_site_fract_x 
 _atom_site_fract_y 
 _atom_site_fract_z 
 _atom_site_U_iso_or_equiv 
 _atom_site_adp_type 
 _atom_site_occupancy 
 _atom_site_symmetry_multiplicity 
 _atom_site_calc_flag 
 _atom_site_refinement_flags 
 _atom_site_disorder_assembly 
 _atom_site_disorder_group 
Si1 Si 0.49702(6) 0.34522(4) 0.30012(3) 0.01982(16) Uani 1 1 d . . . 
C1 C 0.5682(2) 0.28294(16) 0.16905(11) 0.0228(3) Uani 1 1 d . . . 
H1A H 0.5857 0.3729 0.1179 0.027 Uiso 1 1 calc R . . 
C2 C 0.7769(2) 0.16587(18) 0.18345(12) 0.0275(3) Uani 1 1 d . . . 
H2A H 0.9005 0.1977 0.1927 0.033 Uiso 1 1 calc R . . 
C3 C 0.7951(3) 0.02088(18) 0.18372(12) 0.0316(4) Uani 1 1 d . . . 
H3A H 0.9311 -0.0473 0.1945 0.038 Uiso 1 1 calc R . . 
C4 C 0.6111(3) -0.04100(18) 0.16782(14) 0.0340(4) Uani 1 1 d . . . 
H4A H 0.6486 -0.1149 0.1195 0.041 Uiso 1 1 calc R . . 
H4B H 0.5781 -0.0951 0.2366 0.041 Uiso 1 1 calc R . . 
C5 C 0.4213(3) 0.08054(18) 0.12265(12) 0.0288(4) Uani 1 1 d . . . 
H5A H 0.3092 0.0524 0.0924 0.035 Uiso 1 1 calc R . . 
C6 C 0.4021(2) 0.22577(17) 0.12281(11) 0.0255(3) Uani 1 1 d . . . 
H6A H 0.2772 0.2971 0.0922 0.031 Uiso 1 1 calc R . . 
C7 C 0.4508(2) 0.18997(17) 0.40762(11) 0.0235(3) Uani 1 1 d . . . 
H7A H 0.5785 0.1026 0.4150 0.028 Uiso 1 1 calc R . . 
C8 C 0.2647(2) 0.13289(16) 0.38670(11) 0.0245(3) Uani 1 1 d . . . 
H8A H 0.2726 0.0737 0.3329 0.029 Uiso 1 1 calc R . . 
C9 C 0.0895(2) 0.16050(18) 0.43913(12) 0.0282(4) Uani 1 1 d . . . 
H9A H -0.0211 0.1197 0.4212 0.034 Uiso 1 1 calc R . . 
C10 C 0.0574(3) 0.2526(2) 0.52500(13) 0.0361(4) Uani 1 1 d . . . 
H10A H -0.0461 0.3506 0.4993 0.043 Uiso 1 1 calc R . . 
H10B H -0.0013 0.1988 0.5863 0.043 Uiso 1 1 calc R . . 
C11 C 0.2567(3) 0.28176(19) 0.56008(12) 0.0333(4) Uani 1 1 d . . . 
H11A H 0.2566 0.3249 0.6219 0.040 Uiso 1 1 calc R . . 
C12 C 0.4335(3) 0.25063(19) 0.50946(12) 0.0305(4) Uani 1 1 d . . . 
H12A H 0.5556 0.2674 0.5389 0.037 Uiso 1 1 calc R . . 
C13 C 0.2745(2) 0.52435(16) 0.28323(12) 0.0237(3) Uani 1 1 d . . . 
H13A H 0.2549 0.5559 0.3539 0.028 Uiso 1 1 calc R . . 
C14 C 0.0671(2) 0.51007(16) 0.24560(12) 0.0258(3) Uani 1 1 d . . . 
H14A H -0.0051 0.4515 0.2925 0.031 Uiso 1 1 calc R . . 
C15 C -0.0214(2) 0.57450(17) 0.15067(13) 0.0272(3) Uani 1 1 d . . . 
H15A H -0.1544 0.5610 0.1334 0.033 Uiso 1 1 calc R . . 
C16 C 0.0782(3) 0.66778(19) 0.06909(13) 0.0310(4) Uani 1 1 d . . . 
H16A H 0.1248 0.6112 0.0111 0.037 Uiso 1 1 calc R . . 
H16B H -0.0276 0.7625 0.0386 0.037 Uiso 1 1 calc R . . 
C17 C 0.2616(2) 0.70620(17) 0.11405(13) 0.0286(4) Uani 1 1 d . . . 
H17A H 0.3208 0.7780 0.0715 0.034 Uiso 1 1 calc R . . 
C18 C 0.3462(2) 0.64538(17) 0.21027(13) 0.0282(4) Uani 1 1 d . . . 
H18A H 0.4580 0.6800 0.2346 0.034 Uiso 1 1 calc R . . 
H1 H 0.673(2) 0.3876(18) 0.3359(12) 0.017(4) Uiso 1 1 d . . . 
 
loop_ 
 _atom_site_aniso_label 
 _atom_site_aniso_U_11 
 _atom_site_aniso_U_22 
 _atom_site_aniso_U_33 
 _atom_site_aniso_U_23 
 _atom_site_aniso_U_13 
 _atom_site_aniso_U_12 
Si1 0.0187(2) 0.0214(2) 0.0193(2) -0.00153(15) -0.00002(15) -0.00669(15) 
C1 0.0253(8) 0.0214(7) 0.0212(7) -0.0005(5) 0.0030(6) -0.0074(6) 
C2 0.0218(7) 0.0356(9) 0.0239(8) -0.0044(6) 0.0031(6) -0.0062(6) 
C3 0.0300(8) 0.0313(9) 0.0262(8) -0.0030(6) 0.0002(6) 0.0034(7) 
C4 0.0456(10) 0.0230(8) 0.0318(9) -0.0036(6) 0.0025(7) -0.0070(7) 
C5 0.0339(9) 0.0325(8) 0.0226(8) -0.0060(6) 0.0014(6) -0.0126(7) 
C6 0.0259(8) 0.0291(8) 0.0192(7) -0.0020(6) -0.0014(6) -0.0045(6) 
C7 0.0216(7) 0.0251(7) 0.0198(7) 0.0018(6) -0.0004(5) -0.0031(6) 
C8 0.0301(8) 0.0218(7) 0.0195(7) 0.0035(6) -0.0010(6) -0.0081(6) 
C9 0.0276(8) 0.0293(8) 0.0242(8) 0.0077(6) -0.0012(6) -0.0097(6) 
C10 0.0314(9) 0.0424(10) 0.0272(8) 0.0012(7) 0.0067(7) -0.0014(7) 
C11 0.0434(10) 0.0342(9) 0.0176(7) -0.0015(6) -0.0012(7) -0.0040(7) 
C12 0.0348(9) 0.0348(9) 0.0200(8) 0.0009(6) -0.0070(6) -0.0096(7) 
C13 0.0258(8) 0.0223(7) 0.0222(7) -0.0037(6) 0.0003(6) -0.0051(6) 
C14 0.0213(7) 0.0232(7) 0.0311(8) -0.0011(6) 0.0064(6) -0.0051(6) 
C15 0.0211(7) 0.0259(8) 0.0348(9) -0.0056(6) 0.0002(6) -0.0061(6) 
C16 0.0339(9) 0.0328(9) 0.0254(8) -0.0021(7) -0.0009(6) -0.0091(7) 
C17 0.0302(8) 0.0214(7) 0.0336(9) 0.0010(6) 0.0043(6) -0.0097(6) 
C18 0.0280(8) 0.0215(7) 0.0368(9) -0.0033(6) -0.0031(6) -0.0106(6) 
 
_geom_special_details 
; 
 All esds (except the esd in the dihedral angle between two l.s. planes) 
 are estimated using the full covariance matrix.  The cell esds are taken 
 into account individually in the estimation of esds in distances, angles 
 and torsion angles; correlations between esds in cell parameters are only 
 used when they are defined by crystal symmetry.  An approximate (isotropic) 
 treatment of cell esds is used for estimating esds involving l.s. planes. 
; 
 
loop_ 
 _geom_bond_atom_site_label_1 
 _geom_bond_atom_site_label_2 
 _geom_bond_distance 
 _geom_bond_site_symmetry_2 
 _geom_bond_publ_flag 
Si1 C1 1.8947(15) . ? 
Si1 C13 1.8954(15) . ? 
Si1 C7 1.8990(15) . ? 
C1 C6 1.500(2) . ? 
C1 C2 1.508(2) . ? 
C2 C3 1.322(2) . ? 
C3 C4 1.499(2) . ? 
C4 C5 1.492(2) . ? 
C5 C6 1.324(2) . ? 
C7 C8 1.499(2) . ? 
C7 C12 1.506(2) . ? 
C8 C9 1.326(2) . ? 
C9 C10 1.494(2) . ? 
C10 C11 1.494(3) . ? 
C11 C12 1.325(2) . ? 
C13 C14 1.497(2) . ? 
C13 C18 1.506(2) . ? 
C14 C15 1.324(2) . ? 
C15 C16 1.500(2) . ? 
C16 C17 1.490(2) . ? 
C17 C18 1.324(2) . ? 
 
loop_ 
 _geom_angle_atom_site_label_1 
 _geom_angle_atom_site_label_2 
 _geom_angle_atom_site_label_3 
 _geom_angle 
 _geom_angle_site_symmetry_1 
 _geom_angle_site_symmetry_3 
 _geom_angle_publ_flag 
C1 Si1 C13 111.81(7) . . ? 
C1 Si1 C7 114.15(7) . . ? 
C13 Si1 C7 112.67(6) . . ? 
C6 C1 C2 111.45(13) . . ? 
C6 C1 Si1 113.06(10) . . ? 
C2 C1 Si1 108.94(10) . . ? 
C3 C2 C1 122.77(15) . . ? 
C2 C3 C4 123.01(15) . . ? 
C5 C4 C3 112.08(13) . . ? 
C6 C5 C4 122.99(15) . . ? 
C5 C6 C1 123.08(14) . . ? 
C8 C7 C12 111.44(12) . . ? 
C8 C7 Si1 114.96(10) . . ? 
C12 C7 Si1 106.85(10) . . ? 
C9 C8 C7 123.65(14) . . ? 
C8 C9 C10 123.27(15) . . ? 
C11 C10 C9 112.34(14) . . ? 
C12 C11 C10 123.42(15) . . ? 
C11 C12 C7 123.33(15) . . ? 
C14 C13 C18 111.47(12) . . ? 
C14 C13 Si1 115.51(10) . . ? 
C18 C13 Si1 107.28(10) . . ? 
C15 C14 C13 123.70(13) . . ? 
C14 C15 C16 123.21(14) . . ? 
C17 C16 C15 112.30(13) . . ? 
C18 C17 C16 123.40(14) . . ? 
C17 C18 C13 123.49(14) . . ? 
 
_diffrn_measured_fraction_theta_max    0.994 
_diffrn_reflns_theta_full              67.48 
_diffrn_measured_fraction_theta_full   0.994 
_refine_diff_density_max    0.281 
_refine_diff_density_min   -0.346 
_refine_diff_density_rms    0.050 
